# Supplementary material for: Near-infrared driven photocatalytic hydrogen production from ammonia borane hydrolysis using heterostructure-upconverted nanoparticles
Source: Royal Society of Chemistry journal article supplement (doi:10.1039/d4se01047g), 2024-01-01
Supplement: d4se01047g1.pdf [file d4se01047g1.pdf]

## Supporting Information

### Near-infrared driven photocatalytic hydrogen production from ammonia borane hydrolysis using heterostructure-upconverted nanoparticles

*Bushra Maryam<sup>a</sup>, Muhammad Asim<sup>b\*</sup>, Hamna Qayyum<sup>c</sup>, Lun Pan<sup>b</sup>, Ji-Jun Zou<sup>b\*</sup>, Xianhua Liu<sup>a\*</sup>*

- a. School of Environmental Sciences and Engineering, Tianjin University, Tianjin 300072, China
- b. Key Laboratory for Green Chemical Technology of the Ministry of Education, School of Chemical Engineering and Technology, Tianjin University, Tianjin 300072 China
- c. National Synchrotron Radiation Laboratory, University of Science and Technology of China, Hefei, 230029, China

\*Corresponding Author

**Xianhua Liu** – School of Environmental Sciences and Engineering, Tianjin University, Tianjin 300072, China

Email: [lxh@tju.edu.cn](mailto:lxh@tju.edu.cn)

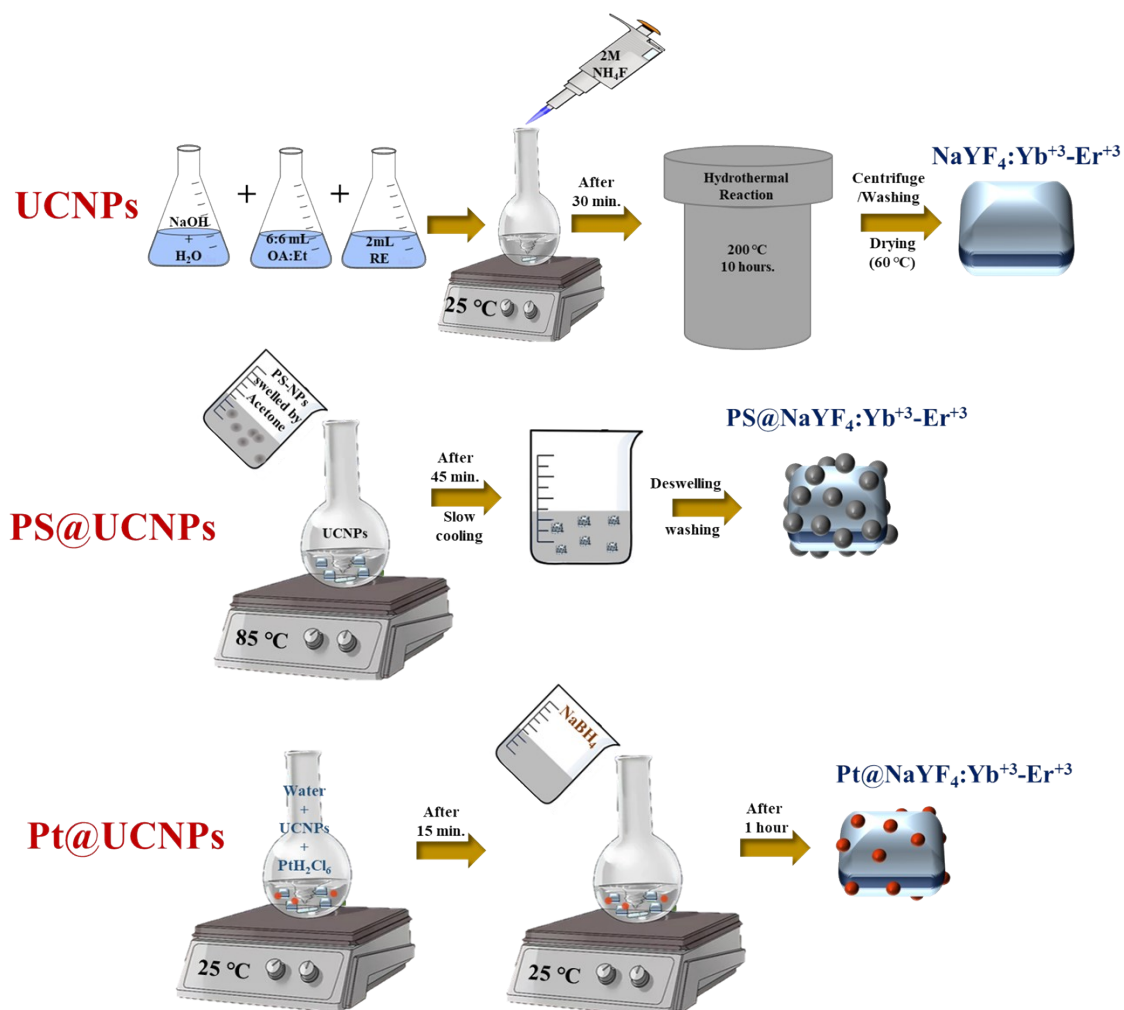

Schematic S1: Synthesis and fabrication process of heterogeneous UCNPs, PS@UCNPs, and Pt@UCNPs.

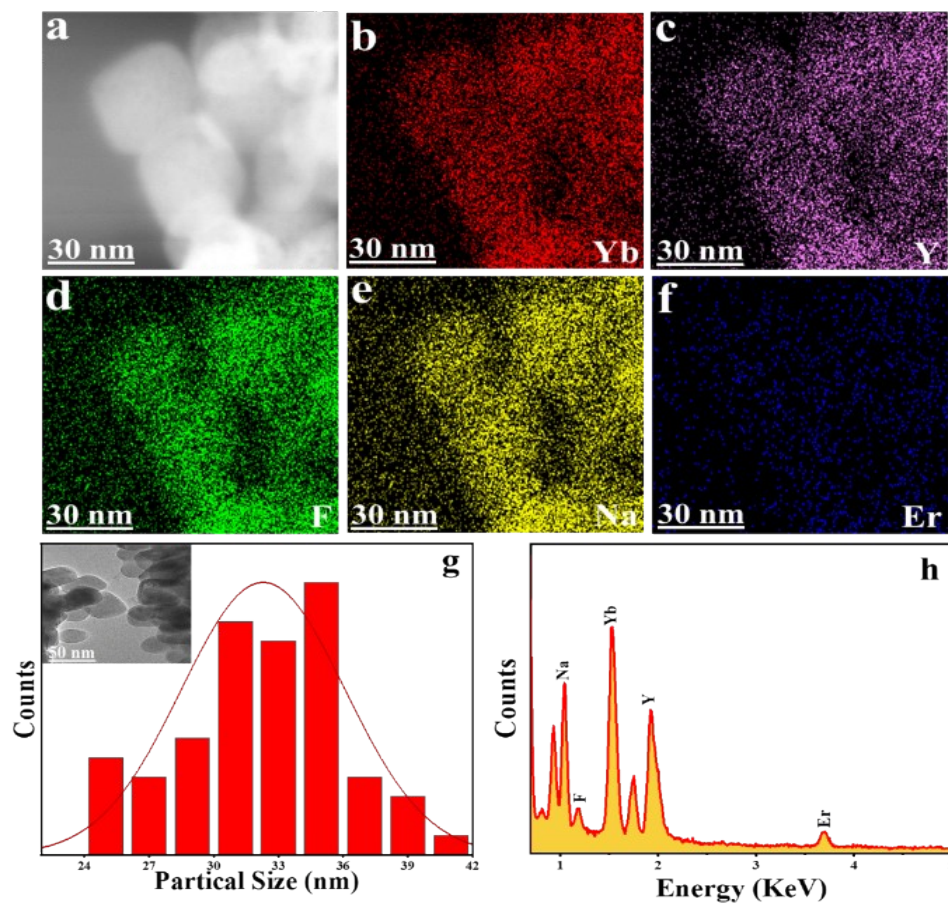

Figure S1: TEM EDX elemental mapping of UCNPs. (a) Nanoparticles TEM image (b) Yb, (c) Y, (d) F, (e) Na, and (f) Er elemental map; (g) particle size distribution along TEM image, (h) EDX elemental graph.

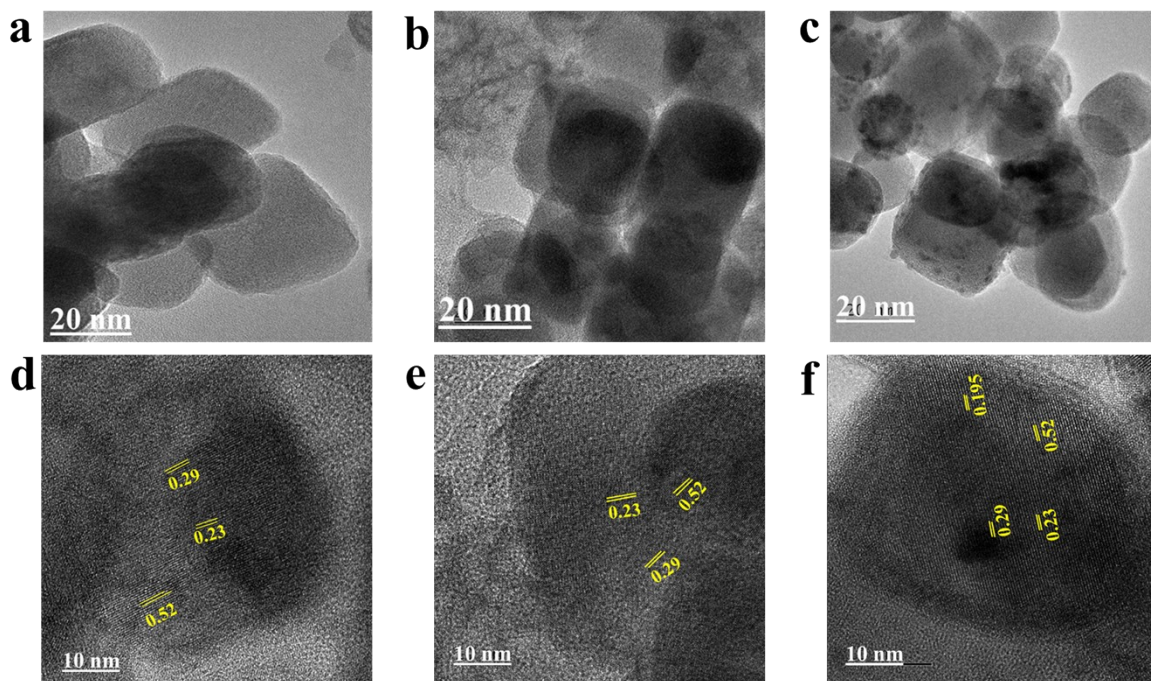

Figure S2: TEM images and interplanar spacing of material. (a) UCNPs, (b) PS@UCNPs (c) Pt@UCNPs, (d) d-spacing of UCNPs, (e) d-spacing of PS@UCNPs, and (f) d-spacing of Pt@UCNPs.

Table S1: interplanar spacing (d-spacing) calculated by XRD planes.

|                             | Peak       | $2\Theta$ | $\Theta$ | $d=n\lambda/2\sin\Theta$ |
|-----------------------------|------------|-----------|----------|--------------------------|
| <b>UCNPs /<br/>PS@UCNPs</b> | <b>100</b> | 17.25     | 8.62     | 5.13637066               |
|                             | <b>110</b> | 29.98     | 14.99    | 2.97756832               |
|                             | <b>200</b> | 30.97     | 15.48    | 2.88516905               |
|                             | <b>111</b> | 38.93     | 19.46    | 2.31144436               |
|                             | <b>201</b> | 43.64     | 21.82    | 2.07241527               |
|                             | <b>211</b> | 53.76     | 26.88    | 1.70373846               |
| <b>Pt@UCNPs</b>             | <b>200</b> | 46.48     | 23.24    | 1.95218507               |
|                             | <b>111</b> | 39.68     | 19.84    | 2.26962887               |
|                             | <b>222</b> | 86.67     | 43.33    | 1.1224563                |

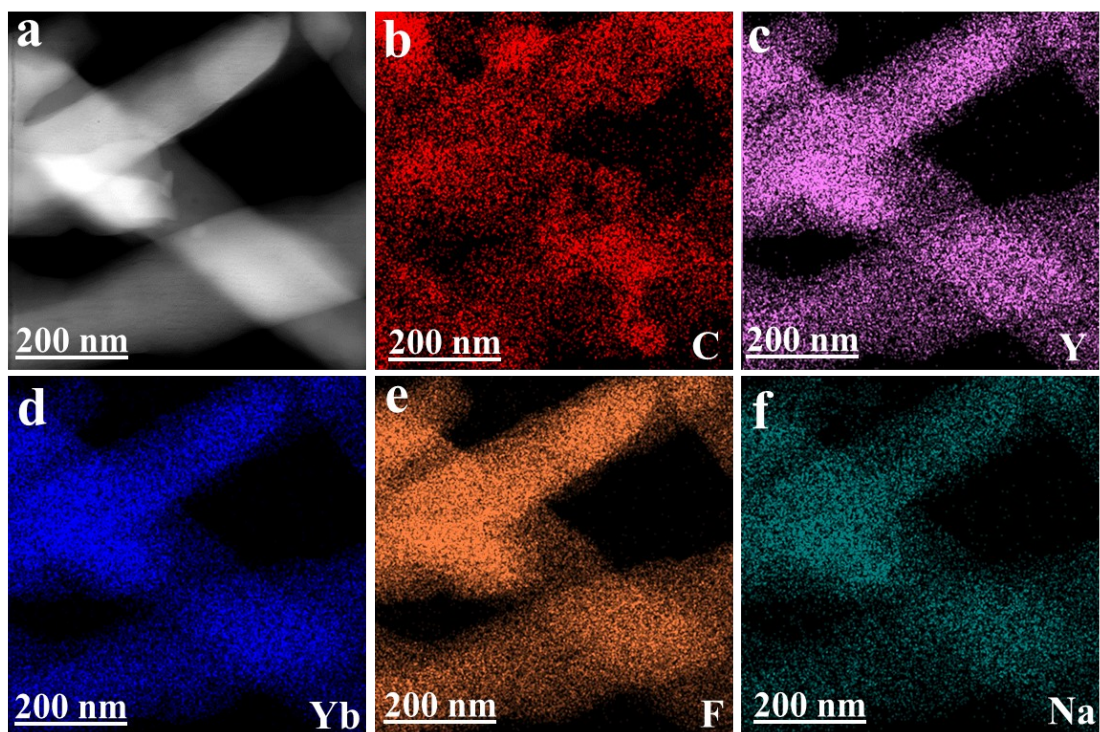

Figure S3: TEM EDX elemental mapping of PS@UCNPs after five cycles. (a) Nanoparticles TEM image (b) C, (c) Y, (d) Yb, (e) F, and (f) Na elemental map.

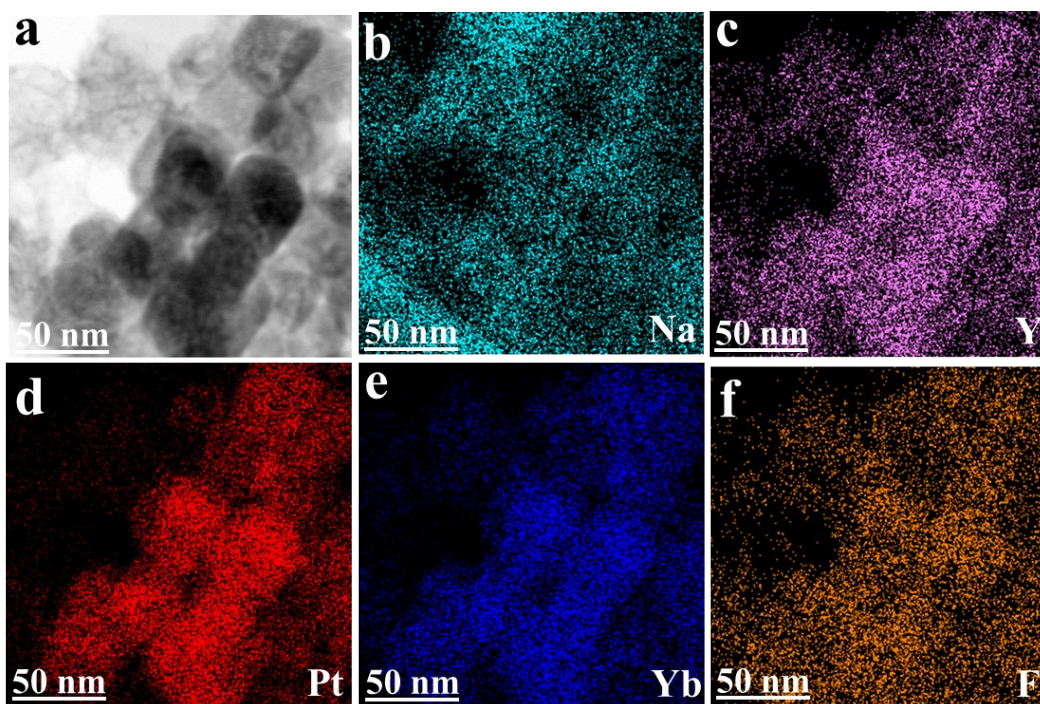

Figure S4: TEM EDX elemental mapping of Pt@UCNPs after five cycles. (a) Nanoparticles TEM image (b) Na, (c) Y, (d) Pt, (e) Yb, and (f) F elemental map.

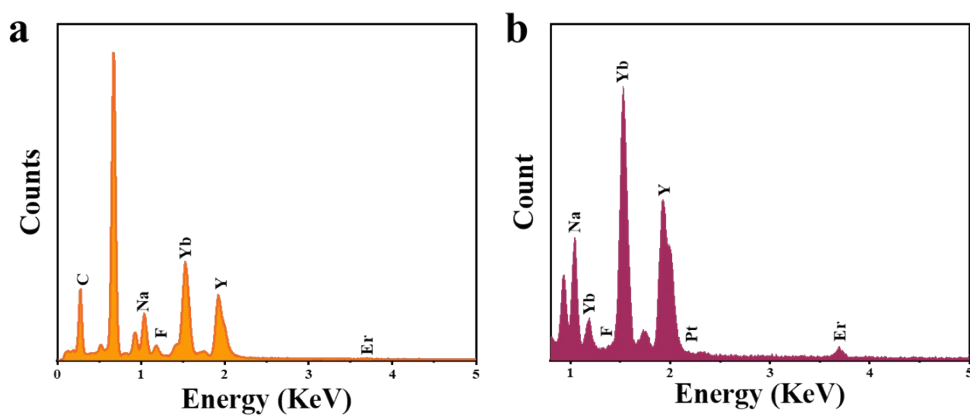

Figure S5: TEM-EDX elemental graph of PS@UCNPs and Pt@UCNPs after five cycles. (a) PS@UCNPs elemental graph, and (b) Pt@UCNPs elemental graph.

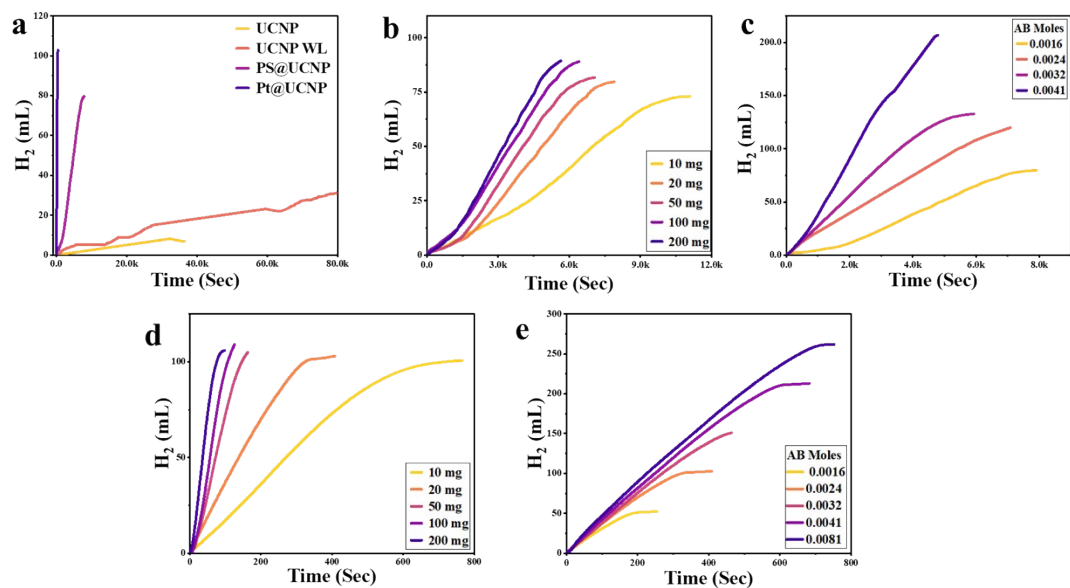

Figure S6: Photo-catalytic activity of PS@UCNPs and Pt@UCNPs. Hydrogen evolution rate of (a) UCNPs, PS@UCNPs, and Pt@UCNPs, (b) the effect of PS@UCNPs concentration, (c) the effect of AB concentration in the presence of PS@UCNP, (d) the effect of Pt@UCNPs amount, (e) the effect of AB concentration in the presence of Pt@UCNPs.

Table S2: ICP-OES results of the solid samples obtained by digestion. Data are given as average  $\pm$  SD (n=3).

| Sample          | Contents (Weight %) |                 |                 |
|-----------------|---------------------|-----------------|-----------------|
|                 | Yb                  | Er              | Pt              |
| <b>UCNPs</b>    | 20.01 $\pm$ 0.02    | 2.89 $\pm$ 0.02 | -               |
| <b>PS@UCNPs</b> | 19.97 $\pm$ 0.01    | 2.86 $\pm$ 0.01 | -               |
| <b>Pt@UCNPs</b> | 19.98 $\pm$ 0.02    | 2.85 $\pm$ 0.01 | 1.90 $\pm$ 0.01 |

Table S3: ICP-OES results of the solid samples obtained by digestion after five cycles. Data are given as average  $\pm$  SD (n=3).

| Sample          | Contents (Weight %) |                 |                 |
|-----------------|---------------------|-----------------|-----------------|
|                 | Yb                  | Er              | Pt              |
| <b>PS@UCNPs</b> | 18.26 $\pm$ 0.02    | 1.95 $\pm$ 0.01 | -               |
| <b>Pt@UCNPs</b> | 14.50 $\pm$ 0.01    | 0.95 $\pm$ 0.01 | 1.75 $\pm$ 0.03 |
